# Supplementary material for: Assessing the use of BreatheSmart® mobile technology in adult patients with asthma: a remote observational study
Source: PubMed Central journal article supplement — BMJ Open Respir Res. 2017 Aug 16;4(1):e000204. doi: 10.1136/bmjresp-2017-000204 (PMC5647478; doi:10.1136/bmjresp-2017-000204), 2017-08-16
Supplement: bmjresp-2017-000204supp001.pdf [file bmjresp-2017-000204supp001.pdf]

**Appendix A**

Pressurized metered dose inhaler (pMDI) compatible with the BreatheSmart® HeroTracker®

| <b>Daily Control</b>                                  |                                            |
|-------------------------------------------------------|--------------------------------------------|
| Advair Diskus (100/50 mg), (250/50 mcg), (500/50 mcg) | Dulera 100/5 mcg and 200/5 mcg             |
| Advair HFA (45/21 mcg), (115/21 mcg), (230/21 mcg)    | Duolin HFA 20 mcg                          |
| AeroSpan 80 mcg (60 count) and (120 count)            | Flovent 44 mcg, 110 mcg and 220 mcg        |
| Alvesco 80 mcg and 160 mcg                            | Flovent Diskus 50 mcg, 100 mcg and 250 mcg |
| Asmanex HFA                                           | Foratec HFA 12 mcg                         |
| Asthavent 100 mcg                                     | Foster 100/6 mcg                           |
| Atimos 12 mcg (50 count), (100 count) and (120 count) | Ipvent HFA 40 mcg                          |
| Beclate HFA 50 mcg, 100 mcg, 200 mcg                  | QVAR 40 mcg, 80 mcg                        |
| Budeflam 100 mcg, 200 mcg                             | Serevent Diskus                            |
| Ciclovent 80 mcg, 160 mcg                             | Seroflo 50 mcg, 125 mcg, 250 mcg           |
| Clenil 50 mcg, 100 mcg, 200 mcg, 250 mcg              | Symbicort 80/4.5 mcg, 160/4.5 mcg          |
| <b>Rescue</b>                                         |                                            |
| Atrovent HFA                                          |                                            |
| ProAir HFA                                            |                                            |
| Proventil HFA                                         |                                            |
| Ventolin HFA 60 count, 200 count                      |                                            |
| Xopenex HFA 80 count, 200 count                       |                                            |
| Evohaler 100 mcg                                      |                                            |
